# Supplementary material for: Target-induced activation of DNAzyme for highly sensitive colorimetric detection of bleomycin via DNA scission
Source: Royal Society of Chemistry journal article supplement (doi:10.1039/d2ra02816f), 2022-01-01
Supplement: d2ra02816f1.pdf [file d2ra02816f1.pdf]

## Supplementary Information

### Target-induced activation of DNzyme for highly sensitive colorimetric detection of bleomycin via DNA scission

Xiaofei Liao <sup>a</sup>, Mengyan Li <sup>a</sup>, Li Zou <sup>\*a,b</sup>

<sup>a</sup> School of Pharmacy, Guangdong Pharmaceutical University, Guangzhou 510006, PR China

<sup>b</sup> Key Specialty of Clinical Pharmacy, The First Affiliated Hospital of Guangdong Pharmaceutical University, Guangzhou 510699, PR China

\*Corresponding author.

E-mail: [lizou@gdpu.edu.cn](mailto:lizou@gdpu.edu.cn)

**Table S1.** Comparison of the proposed sensing strategy with other BLM detection methods.

| Strategy                                                           | Linear range (nM) | LOD (nM) | Assay volume (mL) | Assay time (min) | Ref.      |
|--------------------------------------------------------------------|-------------------|----------|-------------------|------------------|-----------|
| BLM enhanced Fe(II)-H <sub>2</sub> O <sub>2</sub> -ABTS reaction   | 25–1000           | 16       | 0.15              | 20               | 1         |
| Unmodified BLM-induced aggregation of AuNPs                        | 2–150             | 2        | 2.0               | 7.5              | 2         |
| G-triplex based molecular beacon                                   | 0.5–1000          | 0.2      | 0.20              | 30               | 3         |
| Copper ion and G-quadruplex-mediated sensor                        | 0.1–75            | 0.1      | 0.20              | 65               | 4         |
| nitrogen-doped graphene quantum dots                               | 0.34–1300         | 0.34     | 2.0               | 15               | 5         |
| BLM-induced diffusivity enhancement                                | 0.1–100           | 0.033    | 0.10              | 50               | 6         |
| Au/WS <sub>2</sub> nanorod array and Ag/ZnMOF nanozyme             | 0.5–500           | 0.18     | –                 | 15               | 7         |
| CdS-In <sub>2</sub> S <sub>3</sub> heterojunction-based aptasensor | 10–250            | 1        | –                 | 120              | 8         |
| BLM-mediated activation of G-quadruplex DNAzyme                    | 10–1000           | 5        | 0.15              | 40               | This work |

## References

- [1] Y. Qin, L. Zhang, G. Ye, S. Zhao, *Anal. Methods*, 2014, **6**, 7973–7977.
- [2] F. Li, Y. Feng, C. Zhao, B. Tang, *Biosens. Bioelectron.*, 2011, **26**, 4628–4631.
- [3] L. Ma, X. Han, L. Xia, R. M. Kong, F. L. Qu, *Analyst*, 2018, **143**, 5474–5480.
- [4] L. F. Qin, B. Feng, Q. Luo, Z. H. Zhang, P. Zhang, X. S. Ye, T. P. Qing, *Spectrochim. Acta A*, 2022, **267**, 120572.
- [5] X. T. Liu, W. D. Na, Q. Liu, X. G. Su, *Anal. Chim. Acta*, 2018, **1028**, 45–49.
- [6] J. F. Chang, P. P. Gai, H. Y. Li, F. Li, *Talanta*, 2018, **190**, 492–497.
- [7] W. S. Kong, X. X. Guo, M. Jing, F. L. Qu, L. M. Lu, *Biosens. Bioelectron.*, 2020, **150**, 111875.
- [8] M. J. Sun, Y. H. Zhu, K. Yan, J. D. Zhang, *Biosens. Bioelectron.*, 2019, **145**, 111712.
